# Supplementary material
Source: Elsevier journal article supplement (https://rcastoragev2.blob.core.windows.net/b279bef11f7a00848527b45cda317aa0/mmc1.pdf)
Supplement: mmc1 [file mmc1.pdf]

Current Biology, Volume 28

**Supplemental Information**

**A cAMP/PKA/Kinesin-1 Axis Promotes  
the Axonal Transport of Mitochondria  
in Aging *Drosophila* Neurons**

Alessio Vagnoni and Simon L. Bullock

A

*dpr-Gal4>mito::GFP*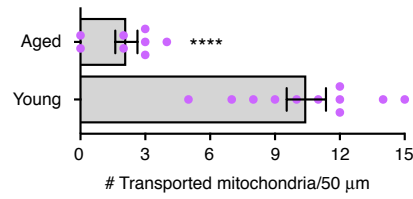

B

*dpr-Gal4>mito::GFP*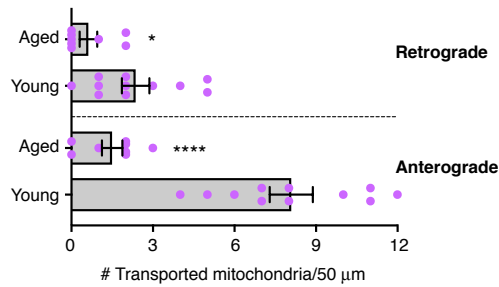

C

Aged flies  
*dpr-Gal4>mito::GFP*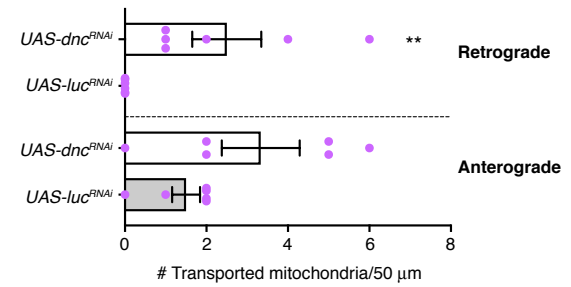

D

Aged flies  
*dpr-Gal4>mito::GFP*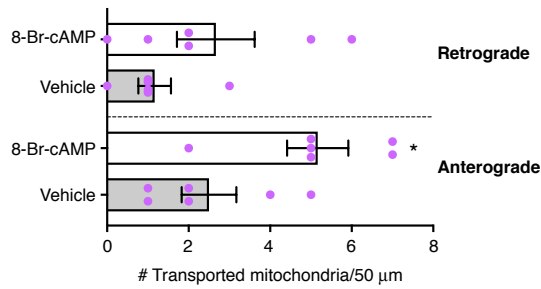

E

Aged flies  
*appl-Gal4>mito::GFP*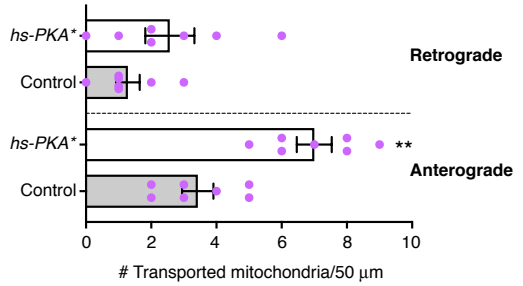

F

Young flies  
*appl-Gal4>mito::GFP*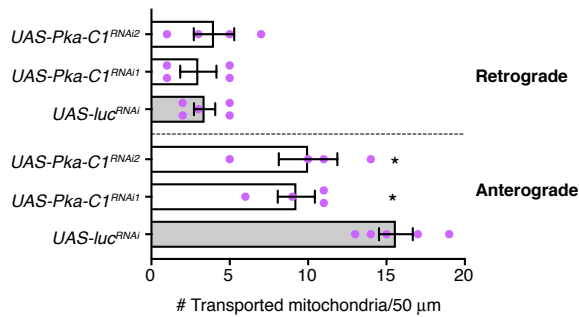

G

Aged flies  
*dpr-Gal4>mito::GFP*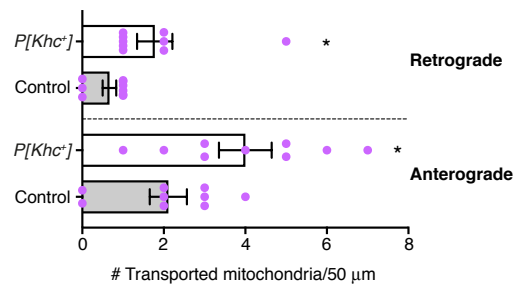

**Figure S1. Supplemental data for mitochondrial movements in wing neurons. Related to Figures 1, 2 and 4.**

(A) Example of magnitude of reduction in mitochondrial transport in wing neurons of aged flies vs young flies. In these and other panels, mitochondria were marked with mito::GFP expressed in wing neurons using the Gal4-UAS system.

(B-G) Charts show number of transported mitochondria in the retrograde and anterograde direction per 50  $\mu\text{m}$  of axonal tract per 3 min of image acquisition. Data in A and B derive from the same movies. Young and aged flies in A and B were, respectively, 2 days and 30 days after eclosion when imaged. Note that in F only anterograde motion of mitochondria was significantly reduced by RNAi of *Pka-C1*. Despite the specific decrease in anterograde transport, the total number of mitochondria in the axonal segment was not altered (Figure 2E). This finding is consistent with previous evidence that net transport is not the sole determinant of the steady-state distribution of mitochondria in axons [S1]. Statistical significance was evaluated with a Mann-Whitney U-test (A-E and G) and a one-way ANOVA with Dunnett's multiple comparisons correction (F). *P*-value: \*, <0.05; \*\*, <0.01; \*\*\*\*, <0.0001. Magenta circles are values for individual wings; error bars are SEM.

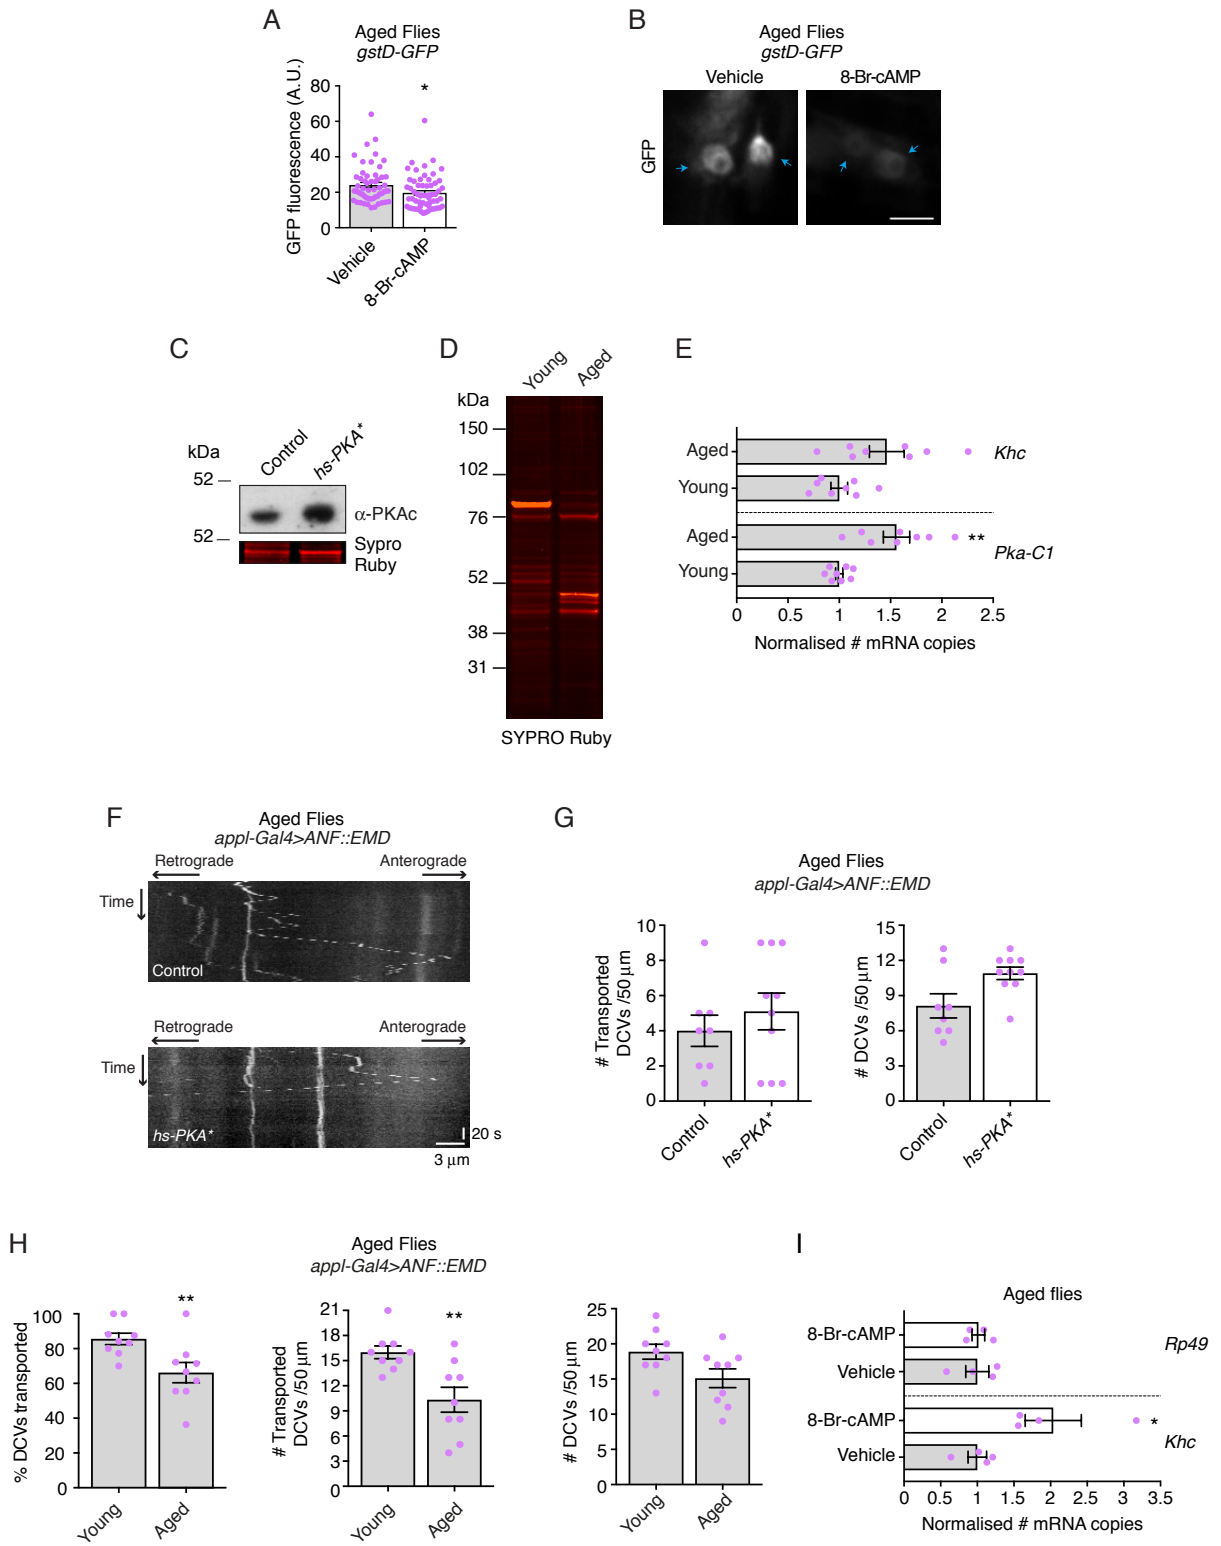

**Figure S2. Supplemental data on cAMP/PKA pathway activation. Related to Figures 1, 2 and 3.**

(A) GFP fluorescence in cell bodies of wing neurons of 30-day-old *gstD-GFP* flies fed throughout adulthood with food supplemented with 8-Br-cAMP or standard food (vehicle). GFP is expressed in response to oxidative stress through activation of the *gstD* enhancer elements by the Nrf2 transcription factor [S2, S3].

(B) Images showing examples of GFP signals in cell bodies (blue arrows) of wing neurons expressing *gstD-GFP*. Scale bar: 5  $\mu$ m.

(C) Top panel: Immunoblot for PKA\* using extracts of heads of 4-day-old control (wild-type) or *hs-PKA\** flies cultured at 30°C for 4 days. The more intense band in the *hs-PKA\** sample confirms expression of PKA\* from the transgene. Note that the antibody recognises both the endogenous *Drosophila* PKAc and exogenous mouse PKA\*. Bottom panel shows a segment of SYPRO Ruby-stained gel from the same samples, which contains an abundant protein that is not responsive to PKA\* induction.

(D) SYPRO Ruby-stained gel of wing extracts of young (day 2) and aged (day 30) wild-type flies.

(E) Abundance of *Pka-C1* and *Khc* mRNAs in young (2 day) and aged (day 30) wild-type flies. mRNA level was assessed by RT-ddPCR, with values normalised to those for the vehicle control. Magenta circles are values for individual technical replicates from two independent reverse transcription reactions. There was a statistically significant increase in *Pka-C1* mRNA in the aged sample compared to the young sample (1.5-fold difference), which could conceivably reflect a mechanism to compensate for reduced PKAc protein.

(F) Kymographs illustrating axonal transport of DCVs in wing neurons of heat-shocked control and *hs-PKA\** aged flies.

(G) Quantification of the number of transported and total DCVs in the axonal tract in the wing of heat-shocked control and *hs-PKA\** aged flies. There was a modest, but not statistically significant, increase in the total number of DCVs in axons when PKA\* was overexpressed.

(H) Quantification of DCV transport in the axonal tract in the wing of young (day 2) and aged (day 30) animals. There was a statistically significant reduction in the percentage of DCVs that are transported in the aged flies compared to the young flies. We previously monitored DCV motility in wild-type wing neurons over the first 16 days of adult life and found no decline in transport [S4]; this contrasts with the sharp decline in mitochondrial transport observed during this period [S4].

In G and H, magenta circles are values for individual wings, with each wing filmed for 3 minutes.

(I) Abundance of *Khc* and *Rp49* mRNA in wings of aged wild-type flies (day 31) fed either vehicle or 8-Br-cAMP for the preceding 24 hours. mRNA abundance was assessed by RT-ddPCR, with values normalised to those for the vehicle control.

Statistical significance was evaluated with the Mann-Whitney U-test. *P*-values: \*, <0.05; \*\*, <0.01; error bars are SEM.

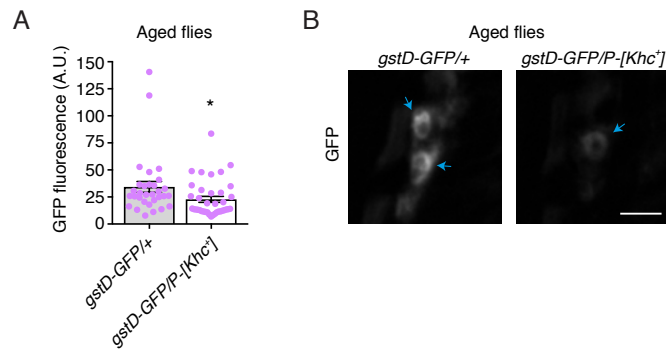

**Figure S3. Supplemental data on Khc overexpression. Related to Figure 4.**

(A) Quantification of GFP fluorescence in cell bodies of wing neurons of 30-day-old *gstD-GFP/+* or *gstD-GFP/P[Khc<sup>+</sup>]* flies. Magenta circles are values for individual Z-projections from a total of 10 wings of each genotype. Statistical significance was evaluated with a two-tailed Student's *t*-test. *P*-values: \*, <0.05; error bars are SEM.

(B) Images showing examples of GFP signals in cell bodies (arrows) of wing neurons expressing *gstD-GFP*. Scale bar: 5  $\mu$ m.

| Condition                     | Mean velocity ( $\mu\text{m s}^{-1}$ ) |                      | Mean run length ( $\mu\text{m}$ ) |                       |
|-------------------------------|----------------------------------------|----------------------|-----------------------------------|-----------------------|
|                               | Anterograde                            | Retrograde           | Anterograde                       | Retrograde            |
| <b>Related to Fig. 1</b>      |                                        |                      |                                   |                       |
| Aged flies:                   |                                        |                      |                                   |                       |
| <i>luc<sup>RNAi</sup></i>     | 0.19 $\pm$ 0.04 (9)                    | NA (0)               | 7.49 $\pm$ 1.93 (9)               | NA (0)                |
| <i>dnc<sup>RNAi</sup></i>     | 0.17 $\pm$ 0.02 (20)                   | 0.33 $\pm$ 0.04 (15) | 12.00 $\pm$ 1.71 (20)             | 10.80 $\pm$ 1.48 (15) |
| Young flies:                  |                                        |                      |                                   |                       |
| Vehicle                       | 0.20 $\pm$ 0.01 (37)                   | 0.32 $\pm$ 0.03 (24) | 14.21 $\pm$ 1.74 (37)             | 11.00 $\pm$ 1.57 (24) |
| 8-Br-cAMP                     | 0.20 $\pm$ 0.01 (47)                   | 0.33 $\pm$ 0.04 (17) | 10.97 $\pm$ 1.17 (47)             | 11.65 $\pm$ 2.71 (17) |
| Aged flies:                   |                                        |                      |                                   |                       |
| Vehicle                       | 0.23 $\pm$ 0.02 (15)                   | 0.47 $\pm$ 0.05 (7)  | 16.96 $\pm$ 2.99 (15)             | 7.99 $\pm$ 2.64 (7)   |
| 8-Br-cAMP                     | 0.24 $\pm$ 0.01 (31)                   | 0.35 $\pm$ 0.06 (16) | 15.79 $\pm$ 1.51 (31)             | 10.21 $\pm$ 1.56 (16) |
| <b>Related to Fig. 2</b>      |                                        |                      |                                   |                       |
| Young flies:                  |                                        |                      |                                   |                       |
| Control                       | 0.19 $\pm$ 0.01 (40)                   | 0.33 $\pm$ 0.05 (20) | 16.66 $\pm$ 1.3 (40)              | 10.93 $\pm$ 1.56 (20) |
| <i>hs-PKA</i> *               | 0.25 $\pm$ 0.01 (52) **                | 0.31 $\pm$ 0.04 (19) | 16.90 $\pm$ 1.35 (52)             | 14.90 $\pm$ 2.95 (19) |
| Aged flies:                   |                                        |                      |                                   |                       |
| Control                       | 0.22 $\pm$ 0.02 (24)                   | 0.29 $\pm$ 0.06 (9)  | 12.14 $\pm$ 1.95 (24)             | 11.88 $\pm$ 2.99 (9)  |
| <i>hs-PKA</i> *               | 0.23 $\pm$ 0.02 (49)                   | 0.38 $\pm$ 0.05 (18) | 10.91 $\pm$ 1.02 (49)             | 13.45 $\pm$ 2.07 (18) |
| Young flies:                  |                                        |                      |                                   |                       |
| <i>luc<sup>RNAi</sup></i>     | 0.21 $\pm$ 0.01 (78)                   | 0.39 $\pm$ 0.05 (17) | 12.25 $\pm$ 1.01 (78)             | 12.19 $\pm$ 2.55 (17) |
| <i>Pka-C1<sup>RNAi1</sup></i> | 0.28 $\pm$ 0.02 (37) ***               | 0.37 $\pm$ 0.06 (12) | 12.71 $\pm$ 1.31 (37)             | 13.39 $\pm$ 2.47 (12) |
| <i>Pka-C1<sup>RNAi2</sup></i> | 0.29 $\pm$ 0.01 (40) ***               | 0.55 $\pm$ 0.07 (16) | 12.18 $\pm$ 1.10 (40)             | 8.60 $\pm$ 1.21 (16)  |
| <b>Related to Fig. 4</b>      |                                        |                      |                                   |                       |
| Young flies:                  |                                        |                      |                                   |                       |
| Control                       | 0.18 $\pm$ 0.01 (104)                  | 0.33 $\pm$ 0.03 (45) | 12.96 $\pm$ 0.84 (104)            | 11.39 $\pm$ 0.87 (45) |
| <i>P[Khc<sup>+</sup>]</i>     | 0.21 $\pm$ 0.07 (110) *                | 0.37 $\pm$ 0.03 (59) | 12.41 $\pm$ 0.87 (110)            | 13.81 $\pm$ 1.31 (59) |
| Aged flies:                   |                                        |                      |                                   |                       |
| Control                       | 0.20 $\pm$ 0.02 (19)                   | 0.23 $\pm$ 0.06 (6)  | 13.56 $\pm$ 2.00 (19)             | 8.12 $\pm$ 2.42 (6)   |
| <i>P[Khc<sup>+</sup>]</i>     | 0.19 $\pm$ 0.01 (36)                   | 0.35 $\pm$ 0.05 (16) | 12.45 $\pm$ 1.39 (36)             | 9.07 $\pm$ 1.91 (16)  |

**Table S1. Velocity and run length of motile mitochondria after manipulation of the cAMP/PKA pathway or Khc overexpression. Related to Figures 1, 2 and 4.**

Number of runs are in parentheses.

NA: not applicable as no retrograde movements were observed.

For comparisons involving two groups, statistical significance was evaluated with a Mann-Whitney U test (when  $n < 10$ ) or two-tailed Student's t-test (when  $n > 10$ ). An ANOVA test with Dunnett's multiple comparison correction was used for *Pka-C1* RNAi experiments, which involved three groups. *P*-value: \*,  $<0.05$ ; \*\*,  $<0.01$ ; \*\*\*,  $<0.0001$ ; errors are SEM.

Both RNAi treatment and overexpression of PKAc significantly increased anterograde velocity in young flies, suggesting complex regulation of this parameter at this stage.

Mean run lengths were not significantly affected by changes in Khc concentration, consistent with travel distances of certain cargoes being insensitive to changes in the number of associated kinesin-1 motors [S5, S6].



| <b>Name</b>         | <b>Sequence</b>        |
|---------------------|------------------------|
| <i>Khc</i> (FWD)    | CAGAACATCATCCTCACCAAC  |
| <i>Khc</i> (RVS)    | CCTCGCTCTCCTCGTTTAC    |
| <i>Rp49</i> (FWD)   | CGGAAACTCAATGGATACTGC  |
| <i>Rp49</i> (RVS)   | CGACTGGTGGCGGATGAAGTG  |
| <i>Rap2L</i> (FWD)  | ACTTCCGTGCATTACGTGCG   |
| <i>Rap2L</i> (RVS)  | CCGACCCGAGCACAACAAC    |
| <i>14-3-3</i> (FWD) | CATGAACGATCTGCCACCAAC  |
| <i>14-3-3</i> (RVS) | CTCTTCGCTCAGTGTATCCAAC |
| <i>eIF-1A</i> (FWD) | ATCAGCTCCGAGGATGACGC   |
| <i>eIF-1A</i> (RVS) | GCCGAGACAGACGTTCCAGA   |
| <i>Milton</i> (FWD) | CAGGATCAGCTGAAGCAACA   |
| <i>Milton</i> (RVS) | AGCTCACAGTGCAGTGAATCC  |
| <i>Miro</i> (FWD)   | ACTCATCTAATCCCCGTTCC   |
| <i>Miro</i> (RVS)   | GCAGCAACTTGTACTTGTAC   |
| <i>Pka-C1</i> (FWD) | GGATCAGCCGATTCAGATCTAC |
| <i>Pka-C1</i> (RVS) | AATATCATTGACGCCCCGCC   |
| <i>Sgg</i> (FWD)    | CTGGTAACAACAGTAGCAGC   |
| <i>Sgg</i> (RVS)    | CATTAGTCGCGCCTATAGC    |

**Table S2. Details of gene-specific primers used for RT-ddPCR. Related to Figures 3, S2 and Key Resources Table.**

## Supplemental References

- S1. Lopez-Domenech, G., Higgs, N.F., Vaccaro, V., Ros, H., Arancibia-Carcamo, I.L., MacAskill, A.F., and Kittler, J.T. (2016). Loss of dendritic complexity precedes neurodegeneration in a mouse model with disrupted mitochondrial distribution in mature dendrites. *Cell Rep.* 17, 317-327.
- S2. Sykiotis, G.P., and Bohmann, D. (2008). Keap1/Nrf2 signaling regulates oxidative stress tolerance and lifespan in *Drosophila*. *Dev. Cell* 14, 76-85.
- S3. Milton, V.J., Jarrett, H.E., Gowers, K., Chalak, S., Briggs, L., Robinson, I.M., and Sweeney, S.T. (2011). Oxidative stress induces overgrowth of the *Drosophila* neuromuscular junction. *Proc. Natl. Acad. Sci. USA* 108, 17521-17526.
- S4. Vagnoni, A., Hoffmann, P.C., and Bullock, S.L. (2016). Reducing Lissencephaly-1 levels augments mitochondrial transport and has a protective effect in adult *Drosophila* neurons. *J. Cell Sci.* 129, 178-190.
- S5. Shubeita, G.T., Tran, S.L., Xu, J., Vershinin, M., Cermelli, S., Cotton, S.L., Welte, M.A., and Gross, S.P. (2008). Consequences of motor copy number on the intracellular transport of Kinesin-1-driven lipid droplets. *Cell* 135, 1098-1107.
- S6. Jamison, D.K., Driver, J.W., Rogers, A.R., Constantinou, P.E., and Diehl, M.R. (2010). Two kinesins transport cargo primarily via the action of one motor: implications for intracellular transport. *Biophys. J.* 99, 2967-2977.
